# Supplementary material for: Layered Cs3Bi2I9 perovskite nanosheets on TiO2 nanorods for high-performance heterostructure photodetectors
Source: Royal Society of Chemistry journal article supplement (doi:10.1039/d4tc03469d), 2024-11-23
Supplement: d4tc03469d1.pdf [file d4tc03469d1.pdf]

## Supporting Information

### Layered $\text{Cs}_3\text{Bi}_2\text{I}_9$ perovskite nanosheets on $\text{TiO}_2$ nanorods for high performance heterostructure photodetectors

Gunasekaran A<sup>a</sup>, Sadhasivam S<sup>a,b</sup>, Gowthambabu V<sup>a</sup>, Anbarasan N<sup>a</sup>, Jeganathan K<sup>a</sup>

Centre for Nanoscience and Nanotechnology, Department of Physics,

Bharathidasan University, Tiruchirappalli- 620 024

School of chemical Engineering, Yeungnam University, Gyeongsan, South Korea-38544

#### Figure Captions

Fig.S1. The XRD pattern of  $\text{BiI}_3$  which grown on  $\text{TiO}_2$  nanorod arrays

Fig.S2. Cross sectional image of  $\text{FTO}/\text{TiO}_2/\text{Cs}_3\text{Bi}_2\text{I}_9$  Photodetector device

Fig.S3. EDS spectra of the  $\text{Cs}_3\text{Bi}_2\text{I}_9$

Fig.S4. The Raman spectrum of  $\text{TiO}_2$  and  $\text{TiO}_2/\text{Cs}_3\text{Bi}_2\text{I}_9$

Fig.S5. XPS spectra of (a) Survey (b) Ti 2p (c) O 1s

Fig.S6. Noise equivalent power (NEP) (a) Different illumination intensity and (b) Different wavelength at a power density of (400 nm) 0.23 mW, (450 nm) 0.77 mW, (500 nm) 0.92 mW, (550 nm) 0.99 mW and (600 nm) 1.15 mW.

Fig.S7. The illumination power vs photocurrent density plot for the photodetector at 2V

Fig.S8. Schematic Diagram of the device fabrication

Table ST1: Comparison of various metrics of the photodetectors in details

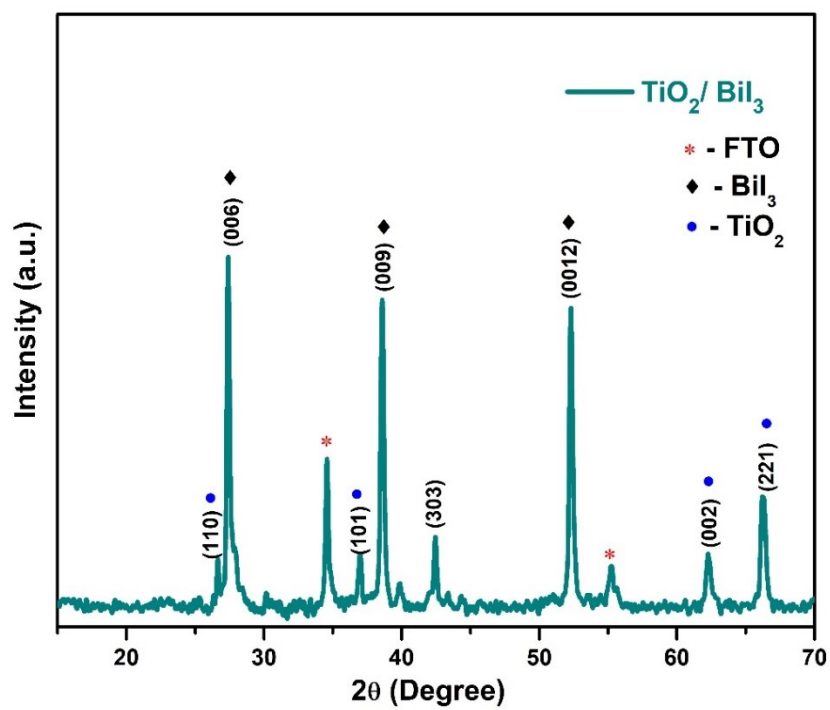

Fig.S1.

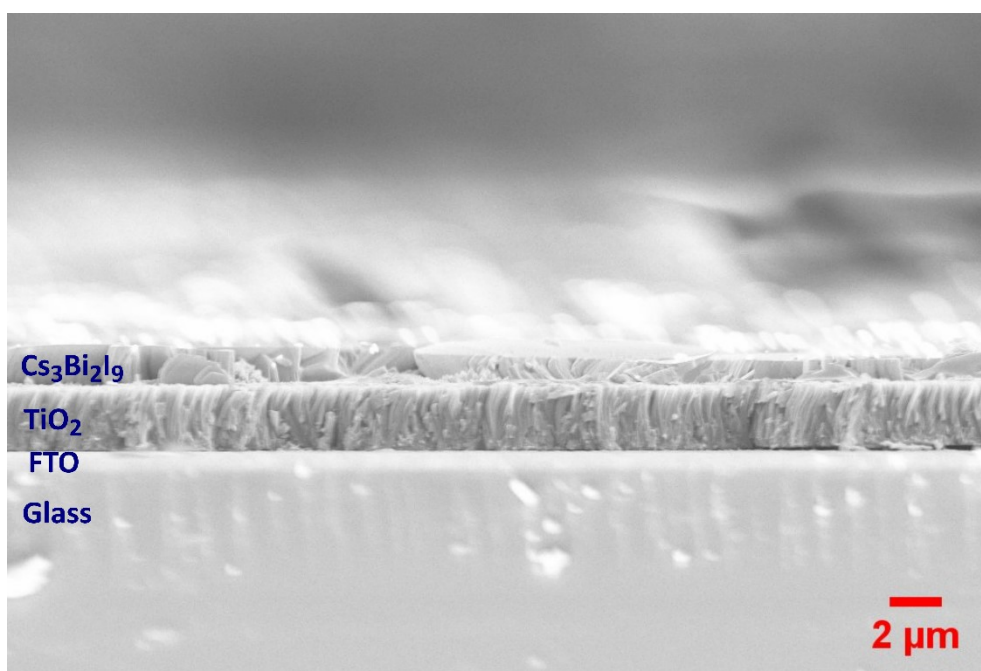

Fig. S2.

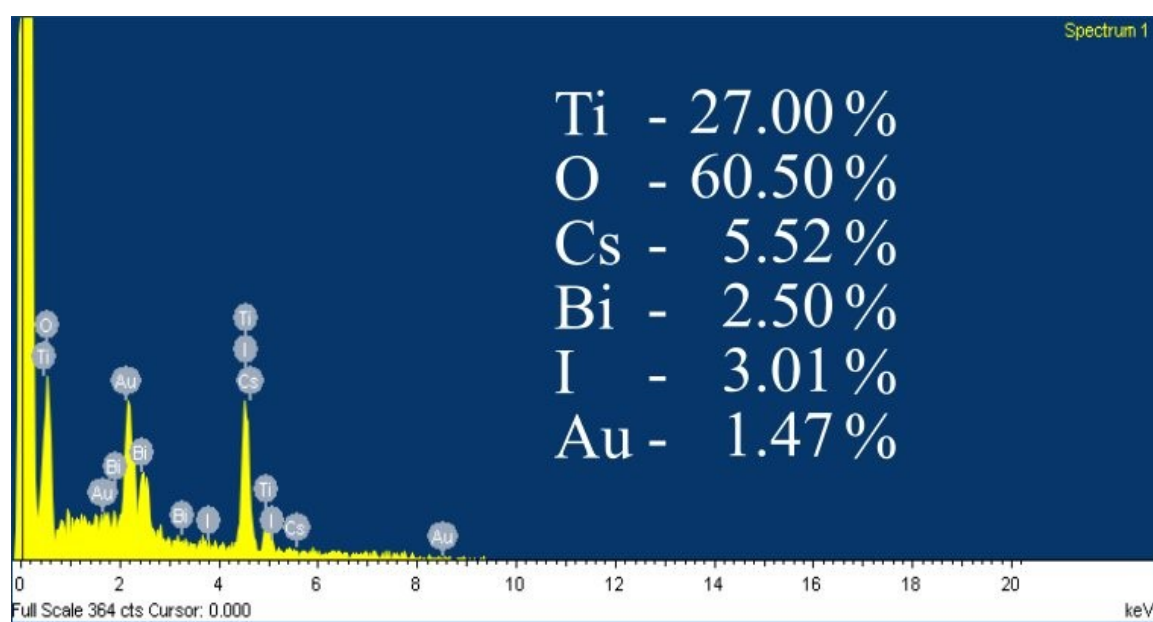

Fig. S3.

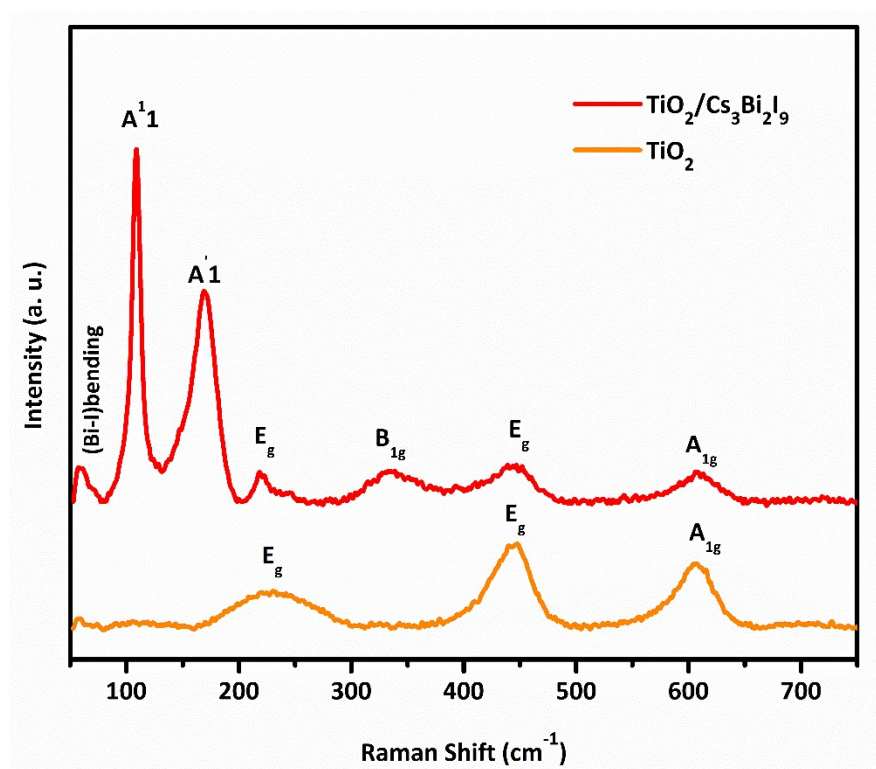

Fig.S4.

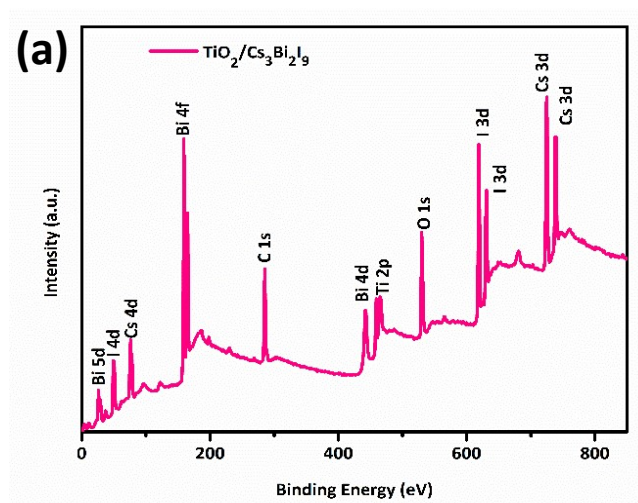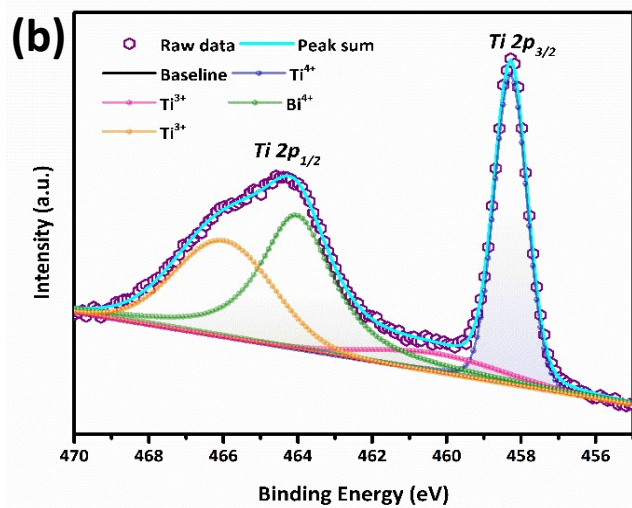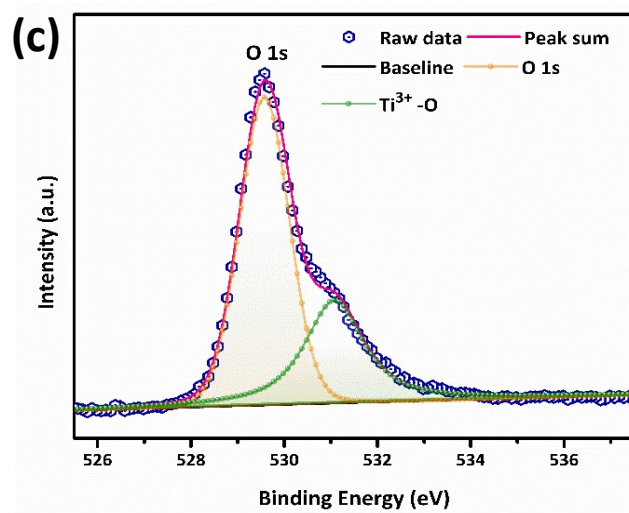

Fig. S5.

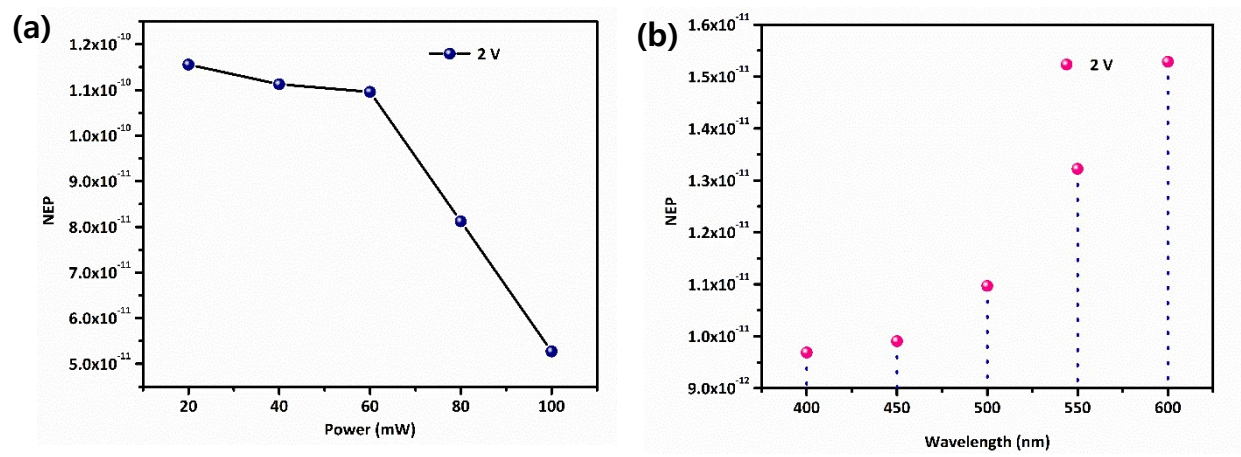

Fig. S6.

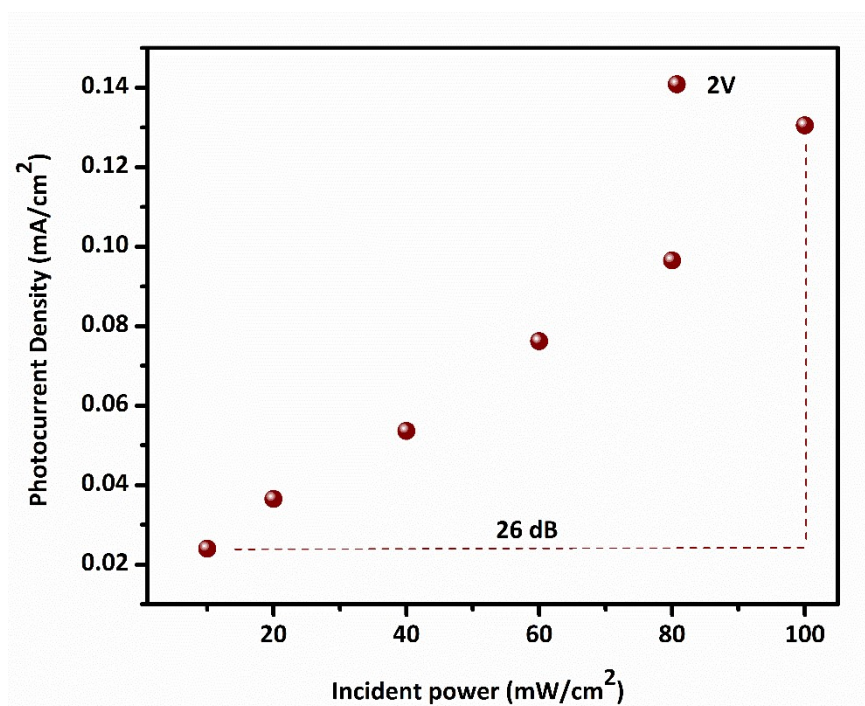

Fig. S7

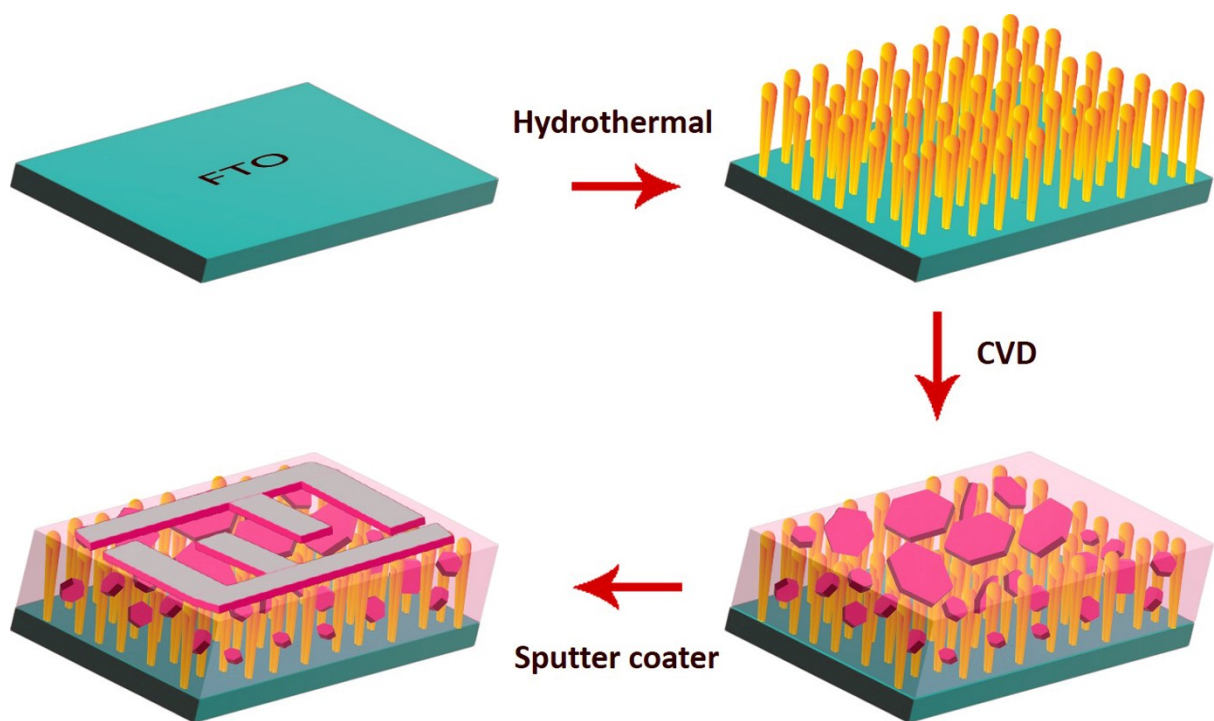

Fig. S8.

**Table S1:** The detailed comparison of parameters of perovskite based photodetectors

| Device Structure                                                                | Type            | Material Structure | Responsivity (A/W)    | D*/10 <sup>8</sup> Jones | EQE (%)              | On/Off Ratio          | Response Time/ms                            | Ref.      |
|---------------------------------------------------------------------------------|-----------------|--------------------|-----------------------|--------------------------|----------------------|-----------------------|---------------------------------------------|-----------|
| TiO <sub>2</sub> /Cs <sub>3</sub> Bi <sub>2</sub> I <sub>9</sub>                | Photoconductor  | Thin Films         | 1.1                   | 19.69 × 10 <sup>2</sup>  | 291                  | 3.72                  | 200/400                                     | This Work |
| ZnO/CsPbI <sub>3</sub> : PbSe/CuSCN                                             | Photoconductor  | Thin Films         | 9.24                  | 3.17 × 10 <sup>6</sup>   | -                    | -                     | 76.8/82                                     | 1         |
| Graphene–CsPbBr <sub>3-x</sub> I <sub>x</sub> /CsPbBr <sub>3</sub>              | Photoconductor  | Nanocrystals       | 8.2 × 10 <sup>8</sup> | 2.4 × 10 <sup>8</sup>    | -                    | –                     | 810/3650                                    | 2         |
| Cs <sub>2</sub> AgBiBr <sub>6</sub>                                             | Photoconductor  | Thin Films         | 55                    | 0.9 × 10 <sup>5</sup>    | 16 × 10 <sup>3</sup> | 10 <sup>5</sup>       | 0.43/0.318                                  | 3         |
| Cs <sub>2</sub> AgBiBr <sub>6</sub>                                             | Photoconductor  | Thin Films         | 0.031                 | 1.87 × 10 <sup>4</sup>   | -                    | 10 <sup>4</sup>       | 0.24/0.29                                   | 4         |
| CsPbBr <sub>3</sub> -ZnO                                                        | Photoconductor  | Thin Films         | 4.25                  | –                        | -                    | 10 <sup>4</sup>       | 0.21/0.24                                   | 5         |
| Cs <sub>3</sub> Bi <sub>2</sub> I <sub>9</sub>                                  | Photoconductor  | Thin Films         | 21.8                  | 1.93 × 10 <sup>5</sup>   | 4 × 10 <sup>3</sup>  | 10 <sup>5</sup>       | 0.33/0.38                                   | 6         |
| ZnO/PbSe:CsPbBr <sub>1.5</sub> I <sub>1.5</sub> /P3HT                           | Photodiode      | Nanocrystals       | 6.16                  | 5.96 × 10 <sup>13</sup>  | 18.22 at 532nm       | 10 <sup>4</sup>       | 350/375                                     | 7         |
| CsPbCl <sub>3</sub>                                                             | Photoconductor  | Nanocrystals       | 1.89                  | –                        | -                    | 10 <sup>3</sup>       | 41/43                                       | 8         |
| CsPbBr <sub>3</sub>                                                             | Photoconductor  | Nano platelets     | 34                    | 7.5 × 10 <sup>4</sup>    | 10 <sup>4</sup>      | –                     | 0.6/0.9                                     | 9         |
| NiO <sub>x</sub> /Nb <sub>2</sub> CT <sub>x</sub> /MAPbI <sub>3</sub> /PCBM/BCP | photodiode      | Thin Films         | 0.86                  | 1.58 × 10 <sup>8</sup>   | 43.92 at 656 nm      |                       | 0.02/0.09                                   | 10        |
| CsPbBr <sub>3</sub>                                                             | Photoconductor  | Nanowires          | –                     | –                        | -                    | 10 <sup>3</sup>       | 100/100                                     | 11        |
| CsPbBr <sub>3</sub> -Au NCs                                                     | Photoconductor  | Nanoparticles      | 0.01                  | 4.56                     | 16.69 at 532 nm      | 10 <sup>6</sup>       | 0.2/1.2                                     | 12        |
| CsPb(Br/I) <sub>3</sub>                                                         | Photoconductor  | Nanorods           | –                     | –                        | -                    | 10 <sup>3</sup>       | 680/660                                     | 13        |
| ZnO/CsSnBr <sub>3</sub> :P3HT/CuSCN                                             | Photodiode      | Nanocrystals       | 1.56                  | 1.40 × 10 <sup>6</sup>   | 56.42 at 532 nm      | -                     | -                                           | 14        |
| CsPbCl <sub>3</sub>                                                             | Photoconductor  | Micro-wire         | 0.0143                | –                        | -                    | 2 × 10 <sup>3</sup>   | 3.212/2.511                                 | 15        |
| P3HT:PbS:CsPbBr <sub>3</sub> /Au/P MMA                                          | Phototransistor | Nanocrystals       | 182 at 532 nm         | 1.09 × 10 <sup>6</sup>   | -                    | -                     | -                                           | 16        |
| CsPbBr <sub>3</sub>                                                             | Photoconductor  | Single Crystal     | 2.1                   | –                        | -                    | –                     | 300/5000                                    | 17        |
| 2D CsPbBr <sub>3</sub>                                                          | Photoconductor  | Nano sheets        | 0.64                  | –                        | 54                   | 10 <sup>4</sup>       | 0.019/0.025                                 | 18        |
| CsPbBr <sub>3</sub>                                                             | Photoconductor  | Microcrystals      | 60000                 | 10 <sup>5</sup>          | 2 × 10 <sup>7</sup>  | –                     | 0.5/1.6                                     | 19        |
| CsPbBr <sub>3</sub>                                                             | Photoconductor  | Nanoribbons        | 18.4                  | 6.1 × 10 <sup>4</sup>    | -                    | 8616                  | 8.7/3.5                                     | 20        |
| CsPbBr <sub>3</sub>                                                             | Photoconductor  | Nano-sheets        | –                     | –                        | -                    | 10 <sup>2</sup>       | 17.8/14.7                                   | 21        |
| CsPbBr <sub>3</sub> -CsPb <sub>2</sub> Br <sub>5</sub>                          | Photoconductor  | Thin Films         | 0.375                 | 2960                     | -                    | 380                   | 0.28/0.64                                   | 22        |
| PTAA/PEIE/CsPbI <sub>3</sub> /PCBM                                              | Photodiode      | Thin Films         | 0.28                  | 9.7 × 10 <sup>4</sup>    | 57.1                 | –                     | 2 × 10 <sup>-5</sup>                        | 23        |
| CsPbX <sub>3</sub> /α-Si radial junction                                        | Photodiode      | Quantum Dots       | 0.054                 | –                        | 50                   | 2.1 × 10 <sup>3</sup> | 0.48/1.03                                   | 24        |
| spiro-OMeTAD/CsPbBr <sub>3</sub> /SnO <sub>2</sub>                              | Photodiode      | Microcrystals      | 0.172                 | 4.8 × 10 <sup>4</sup>    | -                    | 1.3 × 10 <sup>5</sup> | 0.14/0.12                                   | 25        |
| ZnO/CsPbBr <sub>3</sub> /GaN                                                    | Photodiode      | Thin Films         | 0.23                  | 2.4 × 10 <sup>5</sup>    | -                    | 10 <sup>4</sup>       | 281/104                                     | 26        |
| Cs <sub>3</sub> Sb <sub>2</sub> Cl <sub>9</sub>                                 | Photoconductor  | Nanowires          | 3616                  | 0.0125                   | 1 × 10 <sup>3</sup>  | –                     | 130/230                                     | 27        |
| Cs <sub>2</sub> AgBiBr <sub>6</sub>                                             | Photoconductor  | Thin Films         | 7.01                  | 5660                     | 2 × 10 <sup>3</sup>  | 2.2 × 10 <sup>4</sup> | 0.956/0.995                                 | 28        |
| Au/(DMEDA)BiI <sub>5</sub> /Au                                                  | Photoconductor  | Single crystal     | 0.015                 | -                        | 3.67                 | 100                   | 2 × 10 <sup>-8</sup> /1.2 × 10 <sup>6</sup> | 29        |

|                                                       |                |                 |        |                       |                   |                   |             |    |
|-------------------------------------------------------|----------------|-----------------|--------|-----------------------|-------------------|-------------------|-------------|----|
| SnO <sub>2</sub> /Cs <sub>2</sub> AgBiBr <sub>6</sub> | Photoconductor | Thin Films      | 0.11   | 240                   | 40                | –                 | 3/2         | 30 |
| CsPbBr <sub>3</sub>                                   | Photoconductor | Micro particles | 0.18   | –                     | 41 at 532 nm      | 8×10 <sup>3</sup> | 1.8/1.0     | 31 |
| ZnO/PbSe:ZnO/CsPbBr <sub>3</sub> : P3HT/P3HT          | Photodiode     | Quantum Dots    | 1.4    | 6.59 ×10 <sup>6</sup> | 56.13 at 532 nm   | 10 <sup>5</sup>   | 1529/156/5  | 32 |
| CsPbBr <sub>3</sub>                                   | Photoconductor | Microcrystals   | 2.1    | –                     | 485               | 10 <sup>3</sup>   | 0.25/0.45   | 33 |
| CsPbI <sub>3</sub>                                    | Photoconductor | Nanocrystals    | –      | –                     | –                 | 10 <sup>5</sup>   | 24/29       | 34 |
| CsPbI <sub>3</sub>                                    | Photoconductor | Nanowires       | 0.0067 | 1.57                  | 17 at 450 nm      | –                 | 292/234     | 34 |
| CsPbBr <sub>3</sub>                                   | Photoconductor | Single Crystal  | 2      | –                     | –                 | 10 <sup>3</sup>   | 0.111/0.575 | 36 |
| CsPbBr <sub>3</sub> –CNTs                             | Photoconductor | Nano sheets     | 31.1   | –                     | 7×10 <sup>3</sup> | 832               | 0.016/0.38  | 37 |
| CsPbBr <sub>3</sub> –ZnO NPs                          | Photoconductor | Thin Films      | 0.0115 | –                     | –                 | 12.86             | 409/17.92   | 38 |
| α –CsPbI <sub>3</sub> –NaYF <sub>4</sub> :Yb,Er QDs   | Photoconductor | Quantum Dots    | 1.5    | –                     | –                 | 10 <sup>4</sup>   | 5/5         | 39 |
| MoS <sub>2</sub> –CsPbBr <sub>3</sub>                 | Photoconductor | Nano sheets     | 4.4    | 250                   | 30.2 at 442 nm    | 10 <sup>4</sup>   | 0.72/1.01   | 40 |

## References

1. M. Sulaman, S. Yang, H. Guo, C. Li, A. Imran, A. Bukhtiar, M. Qasim, Z. Ge, Y. Song, Y. Jiang and B. Zou, *Chem Sci*, 2024, **15**, 8514–8529.
2. M. Furchi, A. Urich, A. Pospischil, G. Lilley, K. Unterrainer, H. Detz, P. Klang, A. M. Andrews, W. Schrenk, G. Strasser and T. Mueller, *Nano Lett*, 2012, **12**, 2773–2777.
3. Y. Li, Z.-F. Shi, S. Li, L.-Z. Lei, H.-F. Ji, D. Wu, T.-T. Xu, Y.-T. Tian and X.-J. Li, *J Mater Chem C Mater*, 2017, **5**, 8355–8360.
4. Z. Shuang, H. Zhou, D. Wu, X. Zhang, B. Xiao, G. Ma, J. Zhang and H. Wang, *Chemical Engineering Journal*, 2022, **433**, 134544.
5. H. Liu, X. Zhang, L. Zhang, Z. Yin, D. Wang, J. Meng, Q. Jiang, Y. Wang and J. You, *J Mater Chem C Mater*, 2017, **5**, 6115–6122.
6. X.-W. Tong, W.-Y. Kong, Y.-Y. Wang, J.-M. Zhu, L.-B. Luo and Z.-H. Wang, *ACS Appl Mater Interfaces*, 2017, **9**, 18977–18985.
7. M. Sulaman, S. Yang, A. Bukhtiar, P. Tang, Z. Zhang, Y. Song, A. Imran, Y. Jiang, Y. Cui, L. Tang and B. Zou, *Adv Funct Mater*, DOI:10.1002/adfm.202201527.
8. J. Zhang, Q. Wang, X. Zhang, J. Jiang, Z. Gao, Z. Jin and S. (Frank) Liu, *RSC Adv*, 2017, **7**, 36722–36727.
9. X. Liu, D. Yu, F. Cao, X. Li, J. Ji, J. Chen, X. Song and H. Zeng, *Small*, , DOI:10.1002/smll.201700364.
10. S. Shafique, A. Qadir, T. Iqbal, M. Sulaman, L. Yang, Y. Hou, Y. Miao, J. Wu, Y. Wang, F. Zheng, X. Wang and Z. Hu, *J Alloys Compd*, 2024, **1004**, 175903.
11. J. Chen, Y. Fu, L. Samad, L. Dang, Y. Zhao, S. Shen, L. Guo and S. Jin, *Nano Lett*, 2017, **17**, 460–466.
12. Y. Dong, Y. Gu, Y. Zou, J. Song, L. Xu, J. Li, J. Xue, X. Li and H. Zeng, *Small*, 2016, **12**, 5622–5632.
13. X. Tang, Z. Zu, H. Shao, W. Hu, M. Zhou, M. Deng, W. Chen, Z. Zang, T. Zhu and J. Xue, *Nanoscale*, 2016, **8**, 15158–15161.
14. M. Sulaman, S. Y. Yang, Z. H. Zhang, A. Imran, A. Bukhtiar, Z. H. Ge, Y. Tang, Y. R. Jiang, L. B. Tang and B. S. Zou, *Materials Today Physics*, 2022, **27**, 100829.
15. Y. Li, Z. Shi, L. Lei, Z. Ma, F. Zhang, S. Li, D. Wu, T. Xu, X. Li, C. Shan and G. Du, *ACS Photonics*, 2018, **5**, 2524–2532.
16. M. Sulaman, Y. Song, S. Yang, M. Li, M. I. Saleem, P. V. Chandrasekar, Y. Jiang, Y. Tang and B. Zou, *Nanotechnology*, 2020, **31**, 105203.
17. J.-H. Cha, J. H. Han, W. Yin, C. Park, Y. Park, T. K. Ahn, J. H. Cho and D.-Y. Jung, *J Phys Chem Lett*, 2017, **8**, 565–570.
18. J. Song, L. Xu, J. Li, J. Xue, Y. Dong, X. Li and H. Zeng, *Advanced Materials*, 2016, **28**, 4861–4869.
19. B. Yang, F. Zhang, J. Chen, S. Yang, X. Xia, T. Pullerits, W. Deng and K. Han, *Advanced Materials*, DOI:10.1002/adma.201703758.
20. L. Pang, Y. Yao, Q. Wang, X. Zhang, Z. Jin and S. (Frank) Liu, *Particle & Particle Systems Characterization*, DOI:10.1002/ppsc.201700363.
21. L. Lv, Y. Xu, H. Fang, W. Luo, F. Xu, L. Liu, B. Wang, X. Zhang, D. Yang, W. Hu and A. Dong, *Nanoscale*, 2016, **8**, 13589–13596.

22. G. Tong, H. Li, D. Li, Z. Zhu, E. Xu, G. Li, L. Yu, J. Xu and Y. Jiang, *Small*, , DOI:10.1002/sml.201702523.
23. C. Bao, J. Yang, S. Bai, W. Xu, Z. Yan, Q. Xu, J. Liu, W. Zhang and F. Gao, *Advanced Materials*, DOI:10.1002/adma.201803422.
24. J. Lu, X. Sheng, G. Tong, Z. Yu, X. Sun, L. Yu, X. Xu, J. Wang, J. Xu, Y. Shi and K. Chen, *Advanced Materials*, DOI:10.1002/adma.201700400.
25. H. Zhou, J. Zeng, Z. Song, C. R. Grice, C. Chen, Z. Song, D. Zhao, H. Wang and Y. Yan, *J Phys Chem Lett*, 2018, **9**, 2043–2048.
26. Z. Song, H. Zhou, P. Gui, X. Yang, R. Liu, G. Ma, H. Wang and G. Fang, *J Mater Chem C Mater*, 2018, **6**, 5113–5121.
27. B. Pradhan, G. S. Kumar, S. Sain, A. Dalui, U. K. Ghorai, S. K. Pradhan and S. Acharya, *Chemistry of Materials*, 2018, **30**, 2135–2142.
28. L.-Z. Lei, Z.-F. Shi, Y. Li, Z.-Z. Ma, F. Zhang, T.-T. Xu, Y.-T. Tian, D. Wu, X.-J. Li and G.-T. Du, *J Mater Chem C Mater*, 2018, **6**, 7982–7988.
29. L. Yao, G. Niu, L. Yin, X. Du, Y. Lin, X. Den, J. Zhang, J. Tang, *J. Mater. Chem. C* **2020**, **8**, 1239.
30. C. Wu, B. Du, W. Luo, Y. Liu, T. Li, D. Wang, X. Guo, H. Ting, Z. Fang, S. Wang, Z. Chen, Y. Chen and L. Xiao, *Adv Opt Mater*, DOI:10.1002/adom.201800811.
31. X. Li, D. Yu, F. Cao, Y. Gu, Y. Wei, Y. Wu, J. Song and H. Zeng, *Adv Funct Mater*, 2016, **26**, 5903–5912.
32. M. Sulaman, S. Yang, A. Imran, Z. Zhang, A. Bukhtiar, Z. Ge, Y. Song, F. Sun, Y. Jiang, L. Tang and B. Zou, *ACS Appl Mater Interfaces*, 2023, **15**, 25671–25683.
33. F. Cao, D. Yu, X. Li, Y. Zhu, Z. Sun, Y. Shen, Y. Wu, Y. Wei and H. Zeng, *J Mater Chem C Mater*, 2017, **5**, 7441–7445.
34. P. Ramasamy, D.-H. Lim, B. Kim, S.-H. Lee, M.-S. Lee and J.-S. Lee, *Chemical Communications*, 2016, **52**, 2067–2070.
35. A. Waleed, M. M. Tavakoli, L. Gu, S. Hussain, D. Zhang, S. Poddar, Z. Wang, R. Zhang and Z. Fan, *Nano Lett*, 2017, **17**, 4951–4957.
36. J. Song, Q. Cui, J. Li, J. Xu, Y. Wang, L. Xu, J. Xue, Y. Dong, T. Tian, H. Sun and H. Zeng, *Adv Opt Mater*, DOI:10.1002/adom.201700157.
37. X. Li, D. Yu, J. Chen, Y. Wang, F. Cao, Y. Wei, Y. Wu, L. Wang, Y. Zhu, Z. Sun, J. Ji, Y. Shen, H. Sun and H. Zeng, *ACS Nano*, 2017, **11**, 2015–2023.
38. C. Li, C. Han, Y. Zhang, Z. Zang, M. Wang, X. Tang and J. Du, *Solar Energy Materials and Solar Cells*, 2017, **172**, 341–346.
39. X. Zhang, Q. Wang, Z. Jin, J. Zhang and S. (Frank) Liu, *Nanoscale*, 2017, **9**, 6278–6285.
40. X. Song, X. Liu, D. Yu, C. Huo, J. Ji, X. Li, S. Zhang, Y. Zou, G. Zhu, Y. Wang, M. Wu, A. Xie and H. Zeng, *ACS Appl Mater Interfaces*, 2018, **10**, 2801–2809.
